# Supplementary material for: Association of Toll-like receptor 7 variants with life-threatening COVID-19 disease in males
Source: bioRxiv or medRxiv preprint supplement (doi:10.1101/2020.11.19.20234237), 2020-11-27
Supplement: Supplementary file [file media-1.pdf]

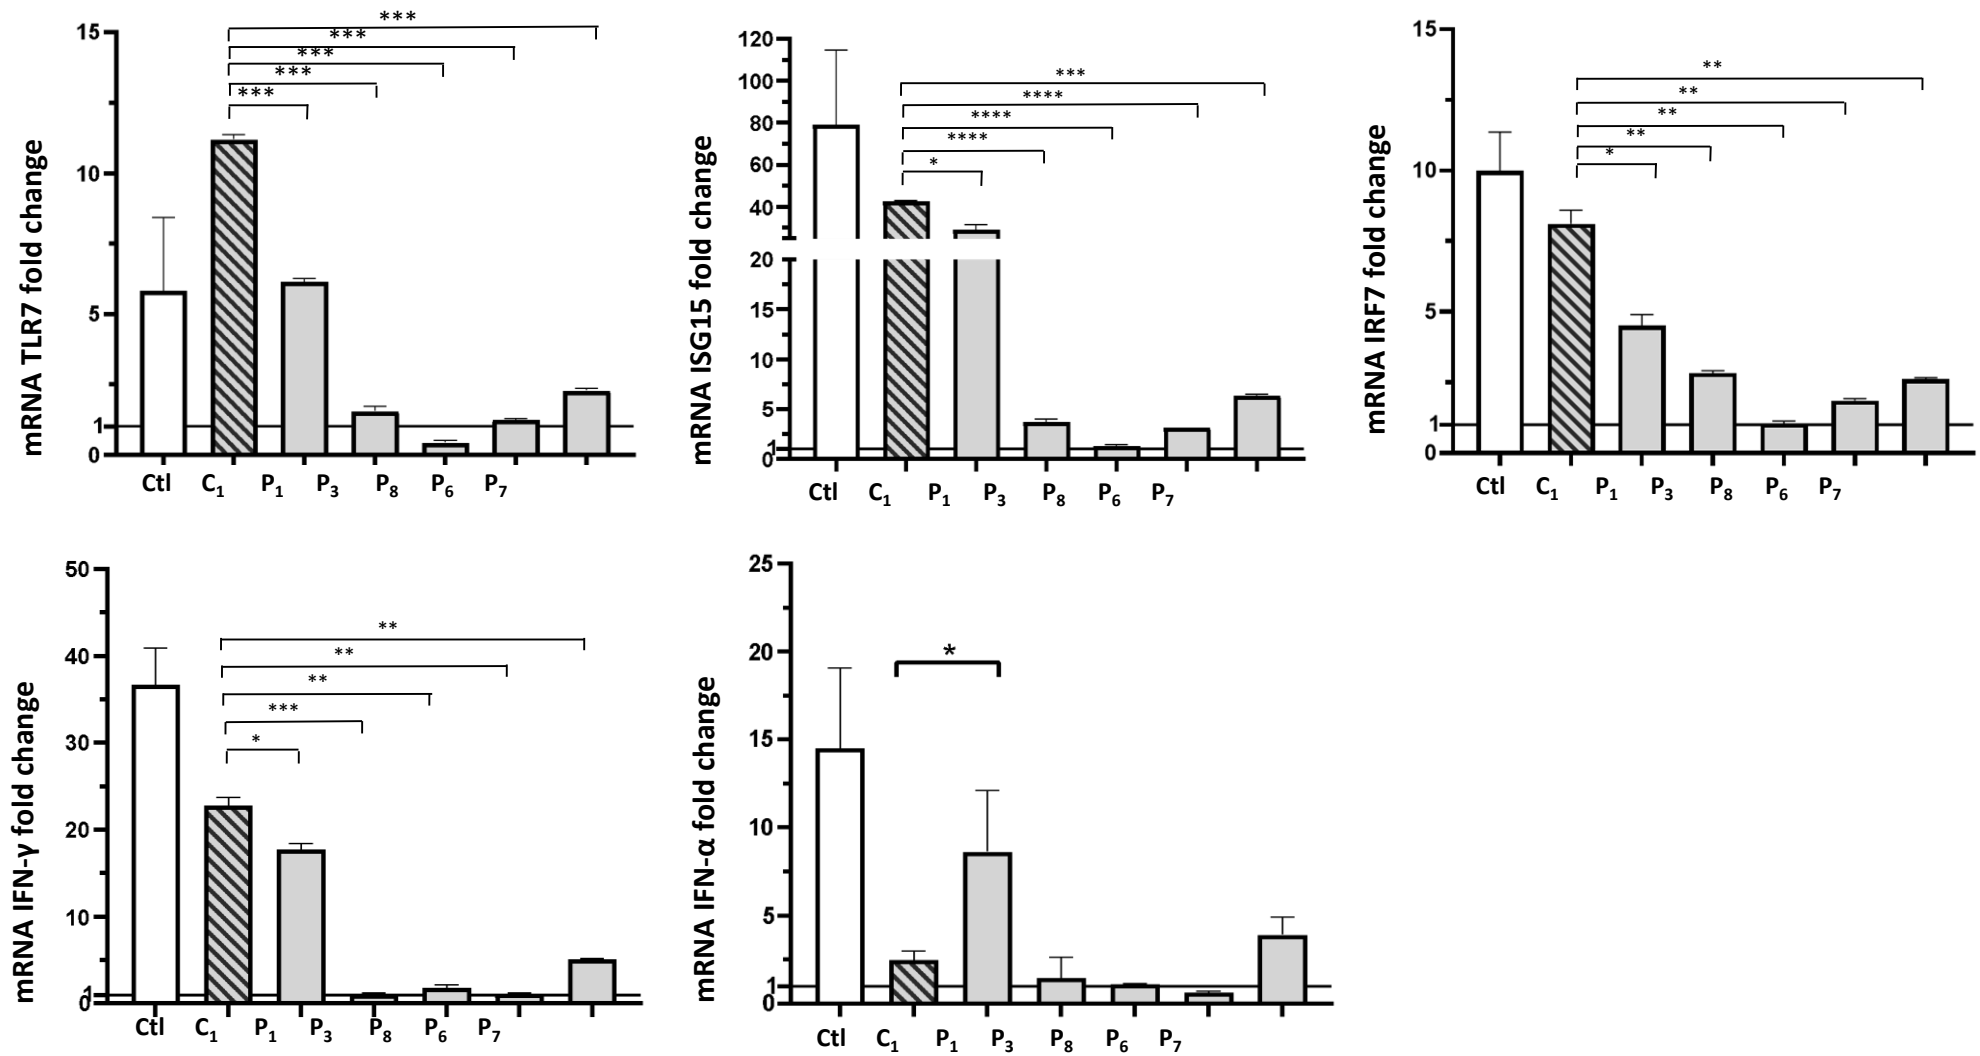

**Supplementary Figure 1.** Gene expression profile analysis in peripheral blood mononuclear cells (PBMCs) after stimulation with a TLR7 agonist for 4 hours in COVID-19 cases compared with the asymptomatic controls (C1). *P* values were calculated using an unpaired *t* test: \**P* < .05; \*\**P* < .01; \*\*\**P* < .001; \*\*\*\**P* < .0001.
