# Supplementary material for: Association of Toll-like receptor 7 variants with life-threatening COVID-19 disease in males
Source: bioRxiv or medRxiv preprint supplement (doi:10.1101/2020.11.19.20234237), 2020-11-27
Supplement: Supplementary file [file media-2.pdf]

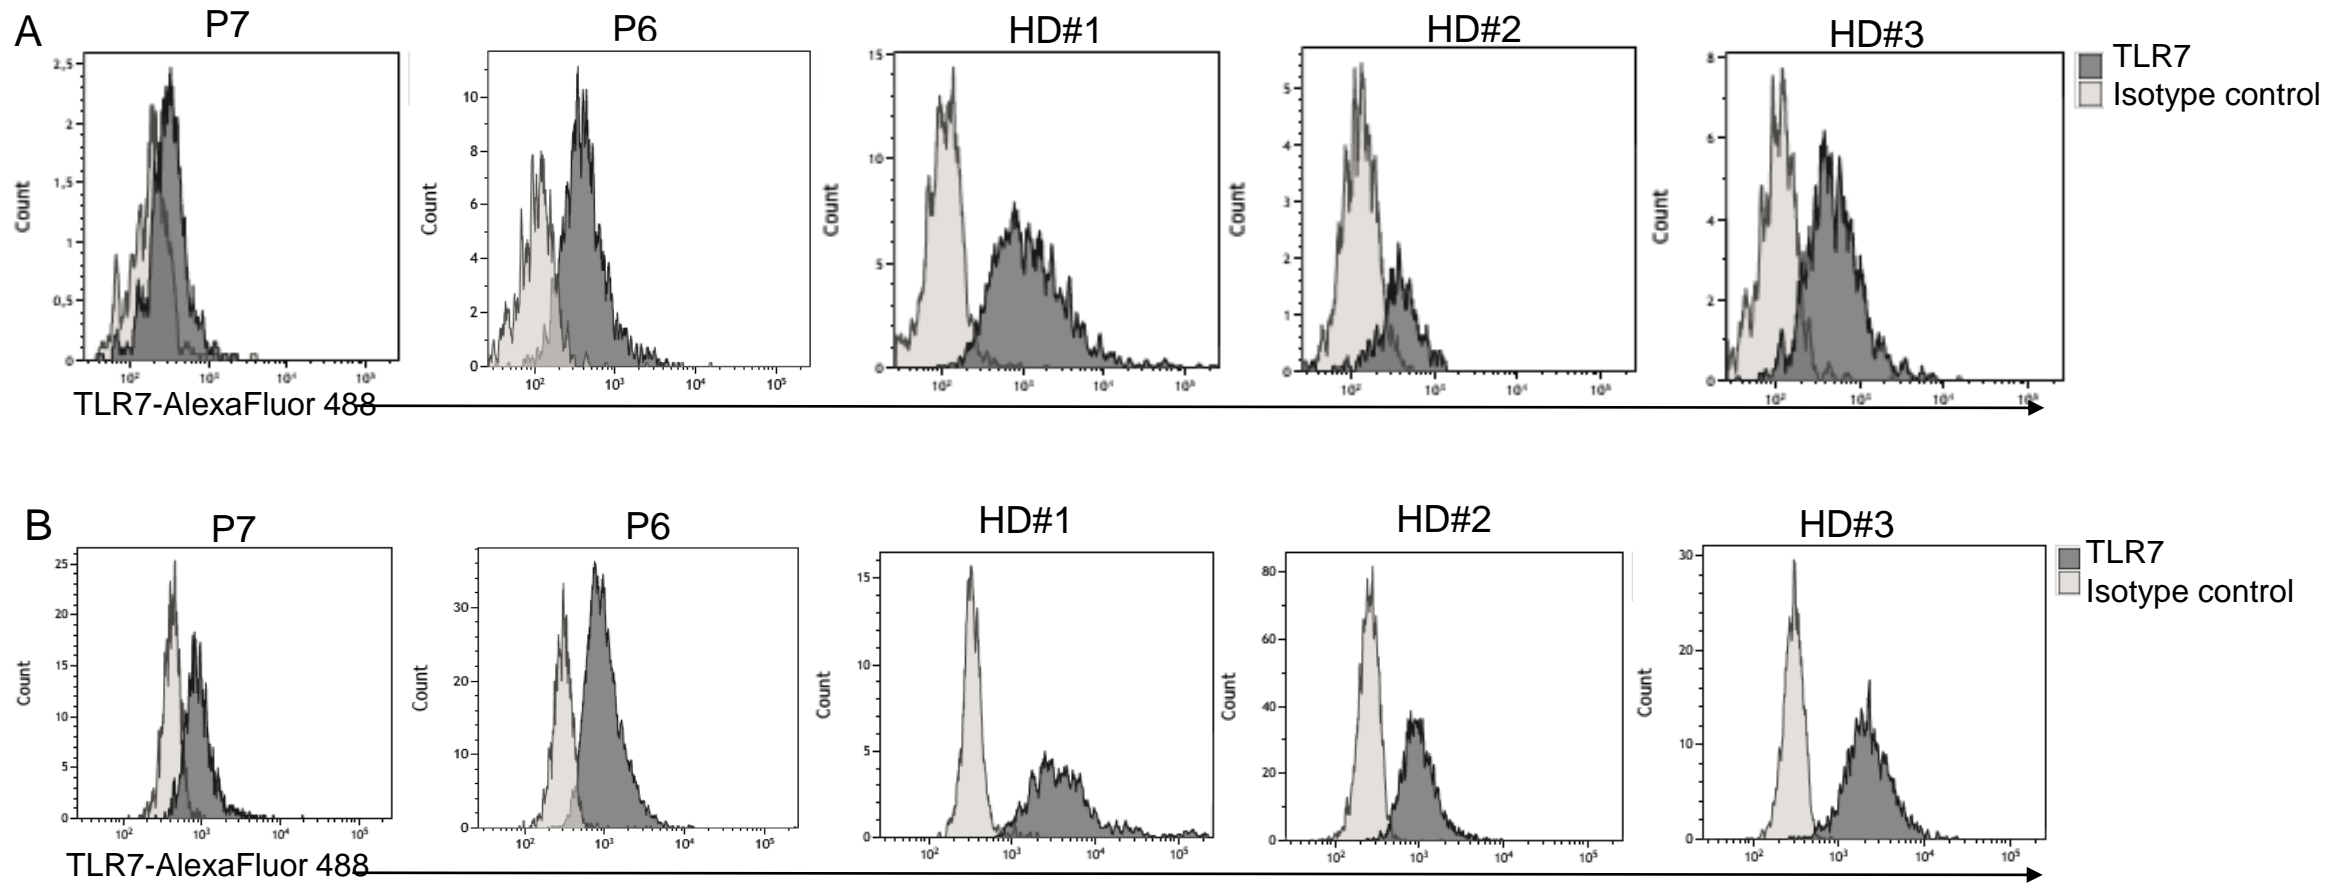

**Supplementary Figure 2.** Representative flow cytometry analysis of intracellularly expressed TLR7 in CD3-CD19<sup>+</sup> B cells (A) and in CD3-CD14<sup>+</sup> monocyte cells (B) in controls and patients.
