# Supplementary material for: Association of Toll-like receptor 7 variants with life-threatening COVID-19 disease in males
Source: bioRxiv or medRxiv preprint supplement (doi:10.1101/2020.11.19.20234237), 2020-11-27
Supplement: Supplementary file [file media-3.pdf]

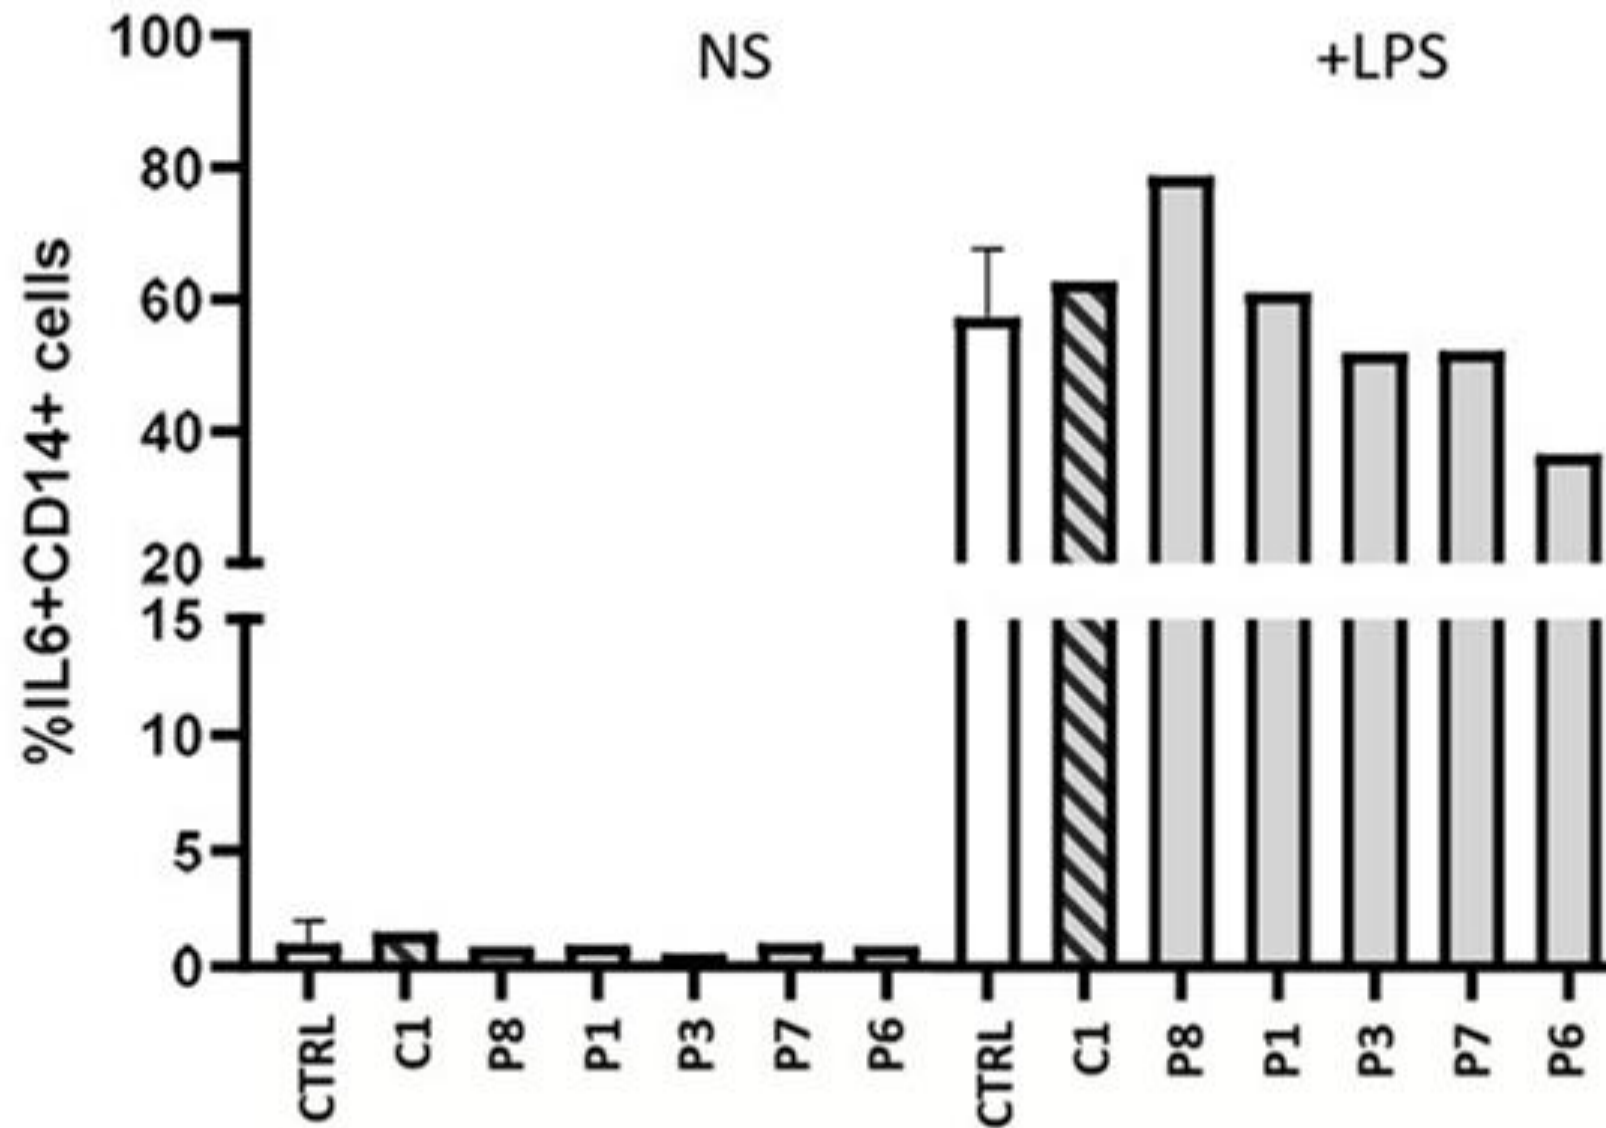

**Supplementary Figure 3.** LPS-induced production of IL6 by CD3-CD14<sup>+</sup> cells. PBMCs from patients and healthy controls (n=4) were stimulated in vitro with Lipopolysaccharide (LPS) at 100ng/ml for 6h or with medium alone. The percentage of IL6<sup>+</sup>CD14<sup>+</sup> cells was evaluated by flow cytometry.
