# Supplementary material for: Association of Toll-like receptor 7 variants with life-threatening COVID-19 disease in males
Source: bioRxiv or medRxiv preprint supplement (doi:10.1101/2020.11.19.20234237), 2020-11-27
Supplement: Supplementary file [file media-4.pdf]

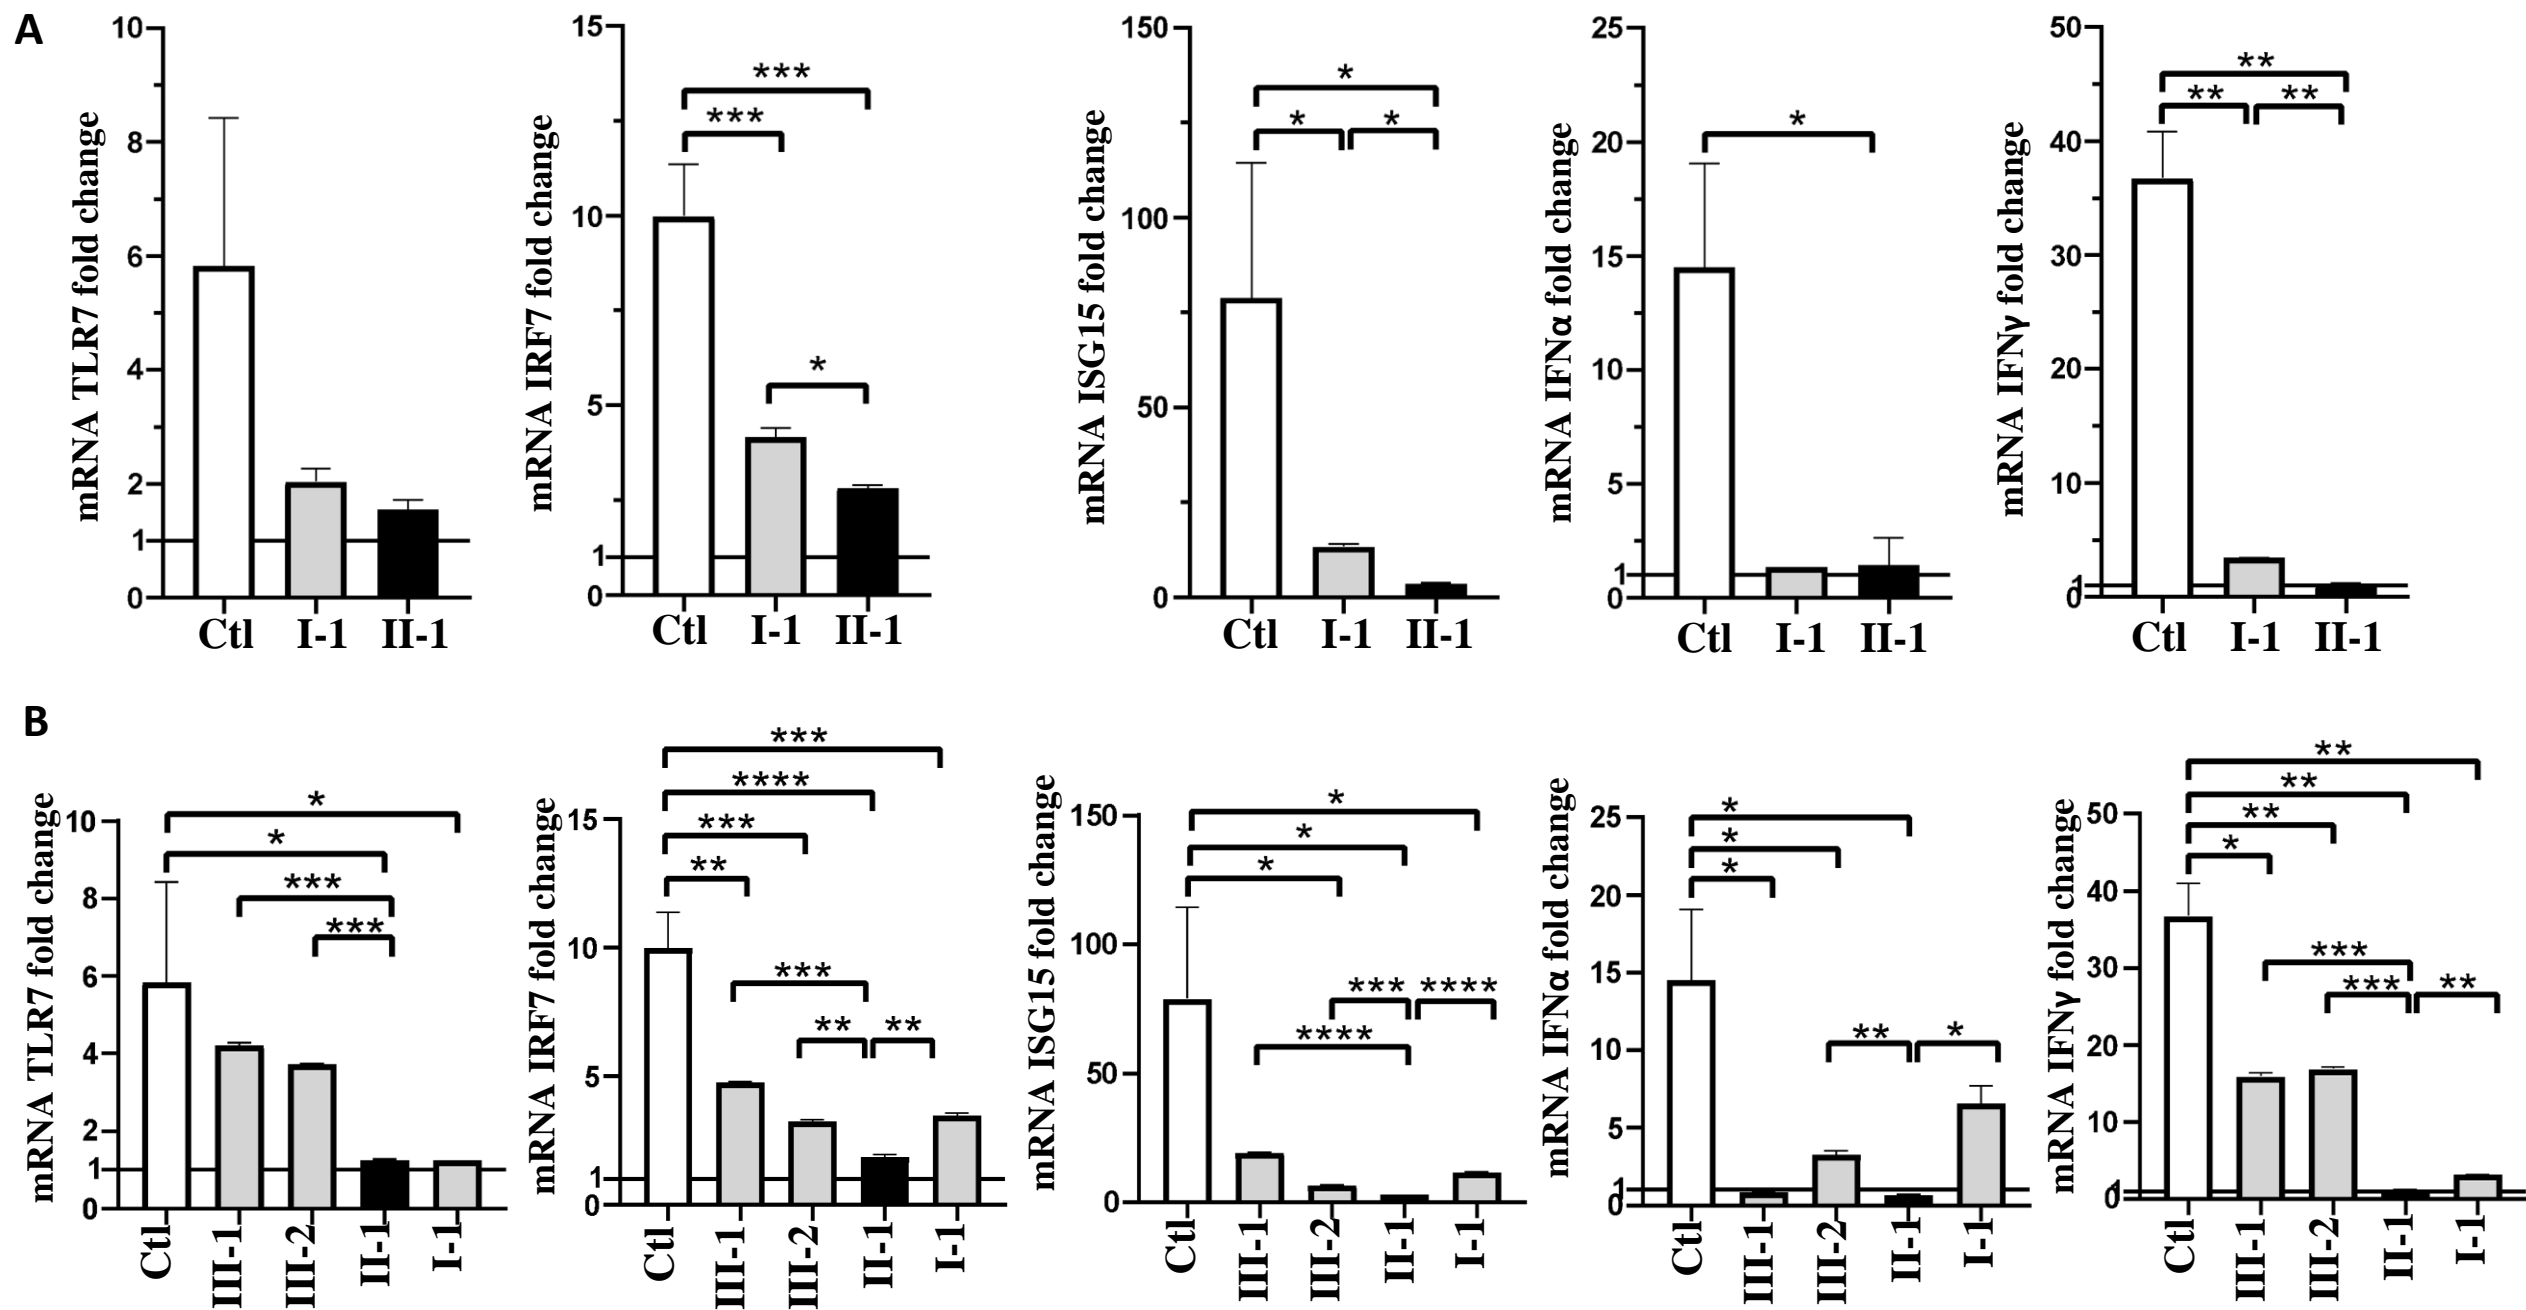

**Supplementary Figure 4.** Gene expression profile analysis in Italian (P3, **Panel A**) and Spanish family (P6, **Panel B**). Fold change in mRNA expression of *TLR7* and type 1 IFN-related genes *ISG15*, *IRF7*, *IFN- $\alpha$*  and *IFN- $\gamma$*  induced by TLR7 agonist imiquimod. *P* values were calculated using an unpaired *t* test: \**P* < .05; \*\**P* < .01; \*\*\**P* < .001; \*\*\*\**P* < .0001.
